# Supplementary material for: Evidence of Virulent Multi-Drug Resistant and Biofilm-Forming Listeria Species Isolated from Various Sources in South Africa
Source: MDPI journal article supplement (doi:10.3390/pathogens11080843), 2022-07-27
Supplement: s1 [file s1]

**Table S1.** List of oligonucleotide primer sequences and PCR conditions used for the identification of *Listeria* spp.

| Primers   | Sequences (5'-3')           | Target Genes          | Amplicon size (bp) | Annealing T <sup>o</sup> C | PCR Conditions                                                                                                                                       | References |
|-----------|-----------------------------|-----------------------|--------------------|----------------------------|------------------------------------------------------------------------------------------------------------------------------------------------------|------------|
| 27F       | AGAGTTTGATCCTGGCTCAG        | <i>16S rRNA</i>       | 1420               | 59                         | 94 °C for 10 min, 25 cycles, 97 °C for 1 min, annealing temperature for 1 min and 72 °C for 1 min 30 s, and final extension at 72 °C for 15 min.     | [1]        |
| 1492R     | GGTTACCTTGTTACGACTT         |                       |                    |                            |                                                                                                                                                      |            |
| PRS F     | GCTGAAGAGATTGCGAAAGAAG      | <i>prs</i>            | 370                | 54                         | 5 min at 94 °C, 35 cycles, 94 °C for 45 s, annealing temperature for 30 s and 72 °C for 1 min, and a final extension of 72 °C for 10 min.            | [2]        |
| PRS R     | CAAAGAAACCTTGGATTGCGG       |                       |                    |                            |                                                                                                                                                      |            |
| PRFA F    | GAT ACA GAA ACA TCG GTT GGC | <i>prfA</i>           | 274                | 56                         | 94 °C for 5 min, 33 cycles, 94 °C for 45 s, annealing temperature for 30 s and extension at 72 °C for 1 min, and final extension at 72 °C for 5 min. | [2]        |
| PRFA R    | GTGTAA TCT TGA TGC CAT CAG  |                       |                    |                            |                                                                                                                                                      |            |
| JOGRAYIF  | GCGGATAAAGGTGTTCTGGGTCAA    | <i>oxidoreductase</i> | 201                |                            |                                                                                                                                                      |            |
| JOGRAYIR  | ATTTGCTATCGTCCGAGGCTAGG     |                       |                    |                            |                                                                                                                                                      |            |
| LIN0464F  | CGCATTATCGCCAAAACCTC        | <i>lin0464</i>        | 749                |                            |                                                                                                                                                      |            |
| LIN0464R  | TCGTGACATAGACGCGATTG        |                       |                    |                            |                                                                                                                                                      |            |
| LIV22228F | CGAATTCCTTATTCACCTTGAGC     | <i>namA</i>           | 463                |                            |                                                                                                                                                      |            |
| LIV22228R | GGTGCTGCGAACTTAACTCA        |                       |                    |                            |                                                                                                                                                      |            |
| LMO1030F  | GCTTGTATTCACTTGGATTGTCTGG   | <i>lmo1030</i>        | 509                | 58                         | 94 °C for 5 min, 35 cycles, annealing temperature for 30 s and 72 °C for 30 s, final extension 72 °C for 5 min.                                      | [3]        |
| LMO1030R  | ACCATCCGCATTCTCAGCCAACT     |                       |                    |                            |                                                                                                                                                      |            |
| ISEELINF  | GTACCTGCTGGGAGTACATA        | <i>lmo0333</i>        | 673                |                            |                                                                                                                                                      |            |
| ISEELINR  | CTGTCTCCATATCCGTACAG        |                       |                    |                            |                                                                                                                                                      |            |
| LWE1801F  | CGTGGCACAATAGCAATCTG        | <i>scrA</i>           | 281                |                            |                                                                                                                                                      |            |
| LWE1801R  | GACATGCCTGCTGAACTAGA        |                       |                    |                            |                                                                                                                                                      |            |

**Table S2.** List of oligonucleotide primer sequences and PCR conditions used for detection of virulence genes in *L. monocytogenes*.

| Primers | Sequences (5'-3')         | Target Genes | Amplicon Size (bp) | Annealing T °C | PCR Conditions                                                                                                                             | References |
|---------|---------------------------|--------------|--------------------|----------------|--------------------------------------------------------------------------------------------------------------------------------------------|------------|
| inlAF   | CCTAGCAGGTCTAACCGCAC      | inlA         | 256                | 52             |                                                                                                                                            | [4]        |
| INLAR   | TCGCTAATTGGTTATGCCC       |              |                    |                |                                                                                                                                            |            |
| INLBF   | TGATGTTGATGGAACGGTAAT     | inlB         | 272                | 52             |                                                                                                                                            | [5]        |
| INLBR   | CTCGTGGAAGTTTGTAGATGC     |              |                    |                |                                                                                                                                            |            |
| INLCR   | AATTCCCACAGGACACAACC      | inlC         | 517                | 52             |                                                                                                                                            | [6]        |
| INLCF   | CGGGAATGCAATTTTTCACTA     |              |                    |                |                                                                                                                                            |            |
| INLJR   | TGTAACCCCGCTTACACAGTT     | inlJ         | 238                | 52             | 94 °C for 5 min, 35 cycles, 94 °C for 35 s, annealing temperature for 30 s and 72 °C for 1 min, and a final extension for 10 min at 72 °C. | [7]        |
| INLJF   | AGCGGCTTGGCAGTCTAATA      |              |                    |                |                                                                                                                                            |            |
| ACTAF   | CCAAGCGAGGTAAATACGGGA     | actA         | 650                | 52             |                                                                                                                                            | [5]        |
| ACTAR   | GTCCGAAGCATTTACCTCTTC     |              |                    |                |                                                                                                                                            |            |
| HLYAF   | ATCATCGACGGCAACCTCGGAGAC  | hlyA         | 404                | 52             |                                                                                                                                            | [7]        |
| HLYAR   | CACCATTCCCAAGCTAAACCAGTGC |              |                    |                |                                                                                                                                            |            |
| PLCAF   | CTCGGACCATTGTAGTCATCTT    | plcA         | 326                | 52             |                                                                                                                                            | [5]        |
| PLCAR   | CACTTTCAGGCGTATTAGAAACGA  |              |                    |                |                                                                                                                                            |            |
| PLCBF   | CTGCTTGAGCGTTCATGTCTCATC  | plcB         | 289                | 52             |                                                                                                                                            | [8]        |
| PLCBR   | ATGGGTTTCACTCTCCTTCTAC    |              |                    |                |                                                                                                                                            |            |
| IAPF    | ACAAGCTGCACCTGTTGCAG      | iap          | 131                | 52             |                                                                                                                                            | [7]        |
| IAPR    | TGACAGCGTGTGTAGTAGCA      |              |                    |                |                                                                                                                                            |            |

**Table S3.** List of oligonucleotide primer sequences and PCR conditions used for detection of antibiotic resistance genes in *L. monocytogenes*.

| Primers  | Sequences (5'-3')          | Target Genes | Amplicon Size (bp) | Annealing T °C | PCR Conditions                                                                                                                             | References |
|----------|----------------------------|--------------|--------------------|----------------|--------------------------------------------------------------------------------------------------------------------------------------------|------------|
| erm(A)F  | AAGCGGTAAACCCCTCTGAG       | erm(A)       | 441                | 53             |                                                                                                                                            | [9]        |
| erm(A)R  | TCAAAGCCTGTCGGAATTGG       |              |                    |                |                                                                                                                                            |            |
| erm(B1)F | CATTTAACGACGAAACTGGC       | erm(B1)      | 425                | 60             | 95 °C for 4min, 35 cycles, 30 s at 94 °C, annealing temperature for 30 s, 1.5 min at 72 °C, and a final extension step at 72 °C for 7 min. | [10]       |
| erm(B1)R | GGAACATCTGTGGTATGGCG       |              |                    |                |                                                                                                                                            |            |
| erm(B2)F | GAAAAGGTACTCAACCAAATA      | erm(B2)      | 639                | 58             |                                                                                                                                            | [9]        |
| erm(B2)R | AGTAACGGTACTTAAATTGTTTAC   |              |                    |                |                                                                                                                                            |            |
| erm(C)F  | ATCTTTGAAATCGGCTCAGG       | erm(C)       | 295                | 49             |                                                                                                                                            | [9]        |
| erm(C)R  | CAAACCCGTATTCCACGATT       |              |                    |                |                                                                                                                                            |            |
| erm(T)F  | TATTATTGAGATTGGTTCAGGG     | erm(T)       | 395                | 56             |                                                                                                                                            | [11]       |
| erm(T)R  | GGATGAAAGTATTCTCTAGGGATTT  |              |                    |                |                                                                                                                                            |            |
| BlaTEMF  | TTC TTG AAG ACG AAA GGG C  | blaTEM       | 1190               | 60             | 94 °C for 60 s at, 30 cycles, 60 s at 94 °C, annealing temperature for 60 s and 72 °C for 60 s, and final extension for 5 min at 72 °C.    | [11]       |
| BlaTEMR  | ATG GTG AGT GGA ACG AAA AC |              |                    |                |                                                                                                                                            |            |

|         |                             |                     |     |    |                                                                                                                                            |      |
|---------|-----------------------------|---------------------|-----|----|--------------------------------------------------------------------------------------------------------------------------------------------|------|
| dfr1F   | TGGTAGCTATATCGAAGAATGGAGT   | <i>dfr1</i>         | 425 | 52 | 95 °C for 10 min, 30 cycles, 45 s at 94 °C, annealing temperature for 45 s and 2 min at 72 °C, with a final extension for 10 min at 72 °C. | [12] |
| dfr1R   | TATGTTAGAGGCGAAGTCTTGGGTA   |                     |     |    |                                                                                                                                            |      |
| dfr5F   | AGCTACTCTTTAAAGCCTTGACGTA   | <i>dfr5</i>         | 341 | 55 |                                                                                                                                            |      |
| dfr5R   | GTGTTGCTCAAAAACAACTTCG      |                     |     |    |                                                                                                                                            |      |
| dfr12F  | GAGCTGAGATATACACTCTGGCACT   | <i>dfr12</i>        | 155 | 60 |                                                                                                                                            |      |
| dfr12R  | GTACGGAATTACAGCTTGAATGGT    |                     |     |    |                                                                                                                                            |      |
| dfr1SF  | ATGGAGTGCCAAAGGTGAAC        | <i>dfr1s</i>        | 241 | 52 |                                                                                                                                            |      |
| dfr1SR  | TATCTCCCCACCACCTGAAA        |                     |     |    |                                                                                                                                            |      |
| dfr5SF  | TCATTAATGGCTGCAAAAGC        | <i>dfr5s</i>        | 460 | 55 |                                                                                                                                            |      |
| dfr5sR  | CCTTTTGCCAAATTTGATAGC       |                     |     |    |                                                                                                                                            |      |
| dfr7sF  | TCTGCAACGTCAGAAAATGG        | <i>dfr7s</i>        | 404 | 55 |                                                                                                                                            |      |
| dfr7sR  | TGCTCAAAAACCAAATTGAAA       |                     |     |    |                                                                                                                                            |      |
| dfr12sF | TTTATCTCGTTGCTGCGATG        | <i>dfr12s</i>       | 457 | 60 |                                                                                                                                            |      |
| dfr12sR | TAAACGGAGTGGGTGTACGG        |                     |     |    |                                                                                                                                            |      |
| dfr17sF | GAAAATATCATTGATTTCTGCAGTG   | <i>dfr17s</i>       | 465 | 55 |                                                                                                                                            |      |
| dfr17sR | TTTTTCCAAATCTGGTATGTATAATTT |                     |     |    |                                                                                                                                            |      |
| pse-1 F | CGCTTCCCGTTAACAAGTAC        | <i>pse-1</i>        | 419 | 57 | 94 °C for 12 min, 34 cycles, 1 min at 94 °C, annealing temperature for 45 s, 5 min at 72 °C, and 5 min, 5 sat 72 °C for final extension.   | [13] |
| pse-1 R | CTGGTTCATTTCAGATAGCG        |                     |     |    |                                                                                                                                            |      |
| ant F   | GTGGATGGCGGCCTGAAGCC        | <i>ant (3'')-la</i> | 526 | 58 | 3 min at 94 °C, 35 cycles, 1 min at 94 °C, annealing temperature for 45 s and 1 min at 72° C, and final extension of 5 min at 72 °C.       | [14] |
| ant R   | ATTGCCCAGTCGGCAGCG          |                     |     |    |                                                                                                                                            |      |
| tet A F | GCTACATCCTGCTTGCCTTC        | <i>tet A</i>        | 210 | 55 | 94 °C for 5 min, 34 cycles, annealing temperature for 45 s, 25 s at 94 °C and 50 s at 72 °C, and 5 min at 72 °C for the final extension.   |      |
| tet A R | CATAGATCGCCGTGAAGAGG        |                     |     |    |                                                                                                                                            |      |
| tet B F | TTGGTTAGGGGCAAGTTTIG        | <i>tet B</i>        | 659 |    |                                                                                                                                            |      |
| tet B R | GTAATGGGCCAATAACACCG        |                     |     |    |                                                                                                                                            |      |
| Sul 1 F | F:GCG CGG CGT GGG CTA CCT   | <i>sul 1</i>        | 350 | 65 | 94 °C for 5 min, 34 cycles, 25 s at 94 °C, annealing temperature for 45 s, and 50 s at 72 °C, and 5 min at 72 °C for the final extension.  |      |
| Sul 1 R | GATTTCCGCGACACCGAGACAA      |                     |     |    |                                                                                                                                            |      |
| Sul 2 F | CGG CAT CGT CAA CAT AACC    | <i>sul 2</i>        | 720 | 52 | 94° C for 5 min, 34 cycles, annealing temperature for 45 s, 25 s at 94 °C and 50 s at 72 °C, and 5 min at 72°C for the final extension.    |      |
| Sul 2 R | GTG TGC GGA TGA AGT CAG     |                     |     |    |                                                                                                                                            |      |

**Table S4.** List of oligonucleotide primer sequences and PCR conditions used for detection of genes associated with biofilm formation in *L. monocytogenes*.

| Primers | Sequences (5'-3')               | Target Genes | Amplicon Size (bp) | Annealing T °C | PCR Conditions                                                                                                                                  | References |
|---------|---------------------------------|--------------|--------------------|----------------|-------------------------------------------------------------------------------------------------------------------------------------------------|------------|
| luxS F  | GGA AAT GCC AGC GCT ACA CTC TTT | luxS         | 208                | 58             | 94 °C for 2 min, 35 cycles, 30 s at 94 °C, annealing temperature for 30 s and 1 min, extension at 72 °C, and final extension of 7 min at 72 °C. | [15]       |
| luxS R  | ATT GCA TGC AGG AACTTC TGT CGC  |              |                    |                |                                                                                                                                                 |            |
| flaA F  | GCG CAA GAA CGT TTA GCA TCT GGT | flaA         | 363                |                |                                                                                                                                                 |            |
| flaA R  | TTG AGT AGC AGC ACC TGT AGC AGT |              |                    |                |                                                                                                                                                 |            |

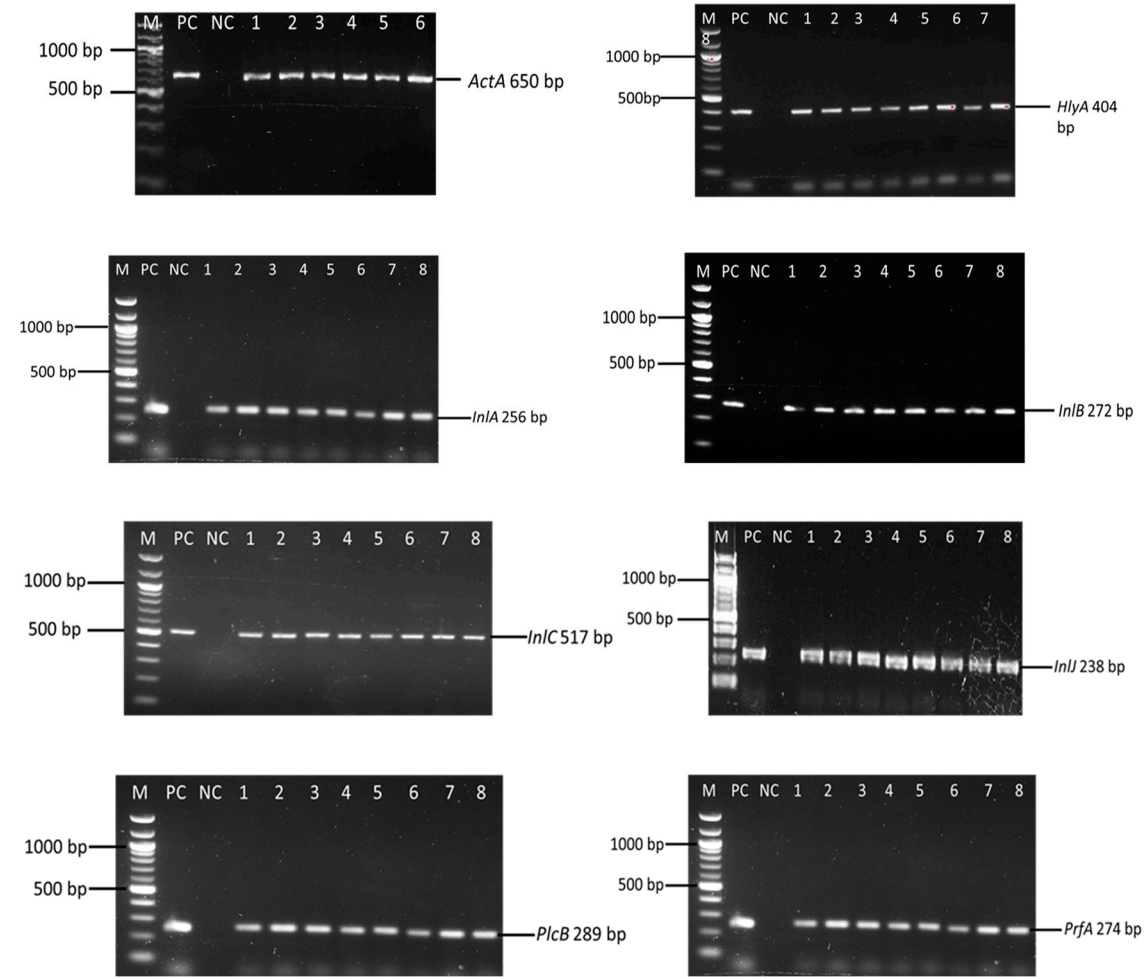

**Figure S1.** PCR amplification of virulence genes (M: Marker, PC: Positive control, NC: Negative control, 1-8: isolates amplification of virulence genes).

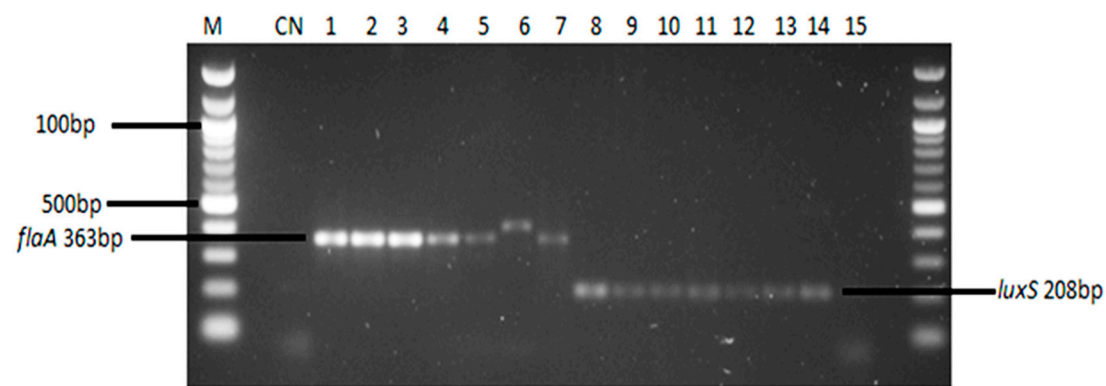

**Figure S2.** PCR amplification of biofilm genes (M: Marker, CN: Negative control, 1: Positive control, 2-7: isolates amplification of *flaA* gene, 8-13: isolates amplification of *LuxS* gene, 14: Positive control, 15: negative control).

#### References:

- Bertrand, S.; Huys, G.; Yde, M.; D'Haene, K.; Tardy, F.; Vrints, M.; Swings, J.; Collard, J.-M. Detection and characterization of tet(M) in tetracycline-resistant *Listeria* strains from human and food-processing origins in Belgium and France. *J. Med Microbiol.* 2005, 54, 1151–1156. <https://doi.org/10.1099/jmm.0.46142-0>.
- Mahm, M.M. Occurrence of *Listeria monocytogenes* in Raw Milk and Dairy Products in Noorabad, Iran. *J. Anim. Veter- Adv.* 2010, 9, 16–19. <https://doi.org/10.3923/javaa.2010.16.19>.
- Ryu, J.; Park, S.H.; Yeom, Y.S.; Shrivastav, A.; Lee, S.-H.; Kim, Y.-R.; Kim, H.-Y. Simultaneous detection of *Listeria* species isolated from meat processed foods using multiplex PCR. *Food Control* 2013, 32, 659–664. <https://doi.org/10.1016/j.foodcont.2013.01.048>.
- Coroneo, V.; Carraro, V.; Aissani, N.; Sanna, A.; Ruggeri, A.; Succa, S.; Meloni, B.; Pinna, A.; Sanna, C. Detection of Virulence Genes and Growth Potential in *Listeria monocytogenes* Strains Isolated from Ricotta Salata Cheese. *J. Food Sci.* 2015, 81, M114–M120. <https://doi.org/10.1111/1750-3841.13173>.
- Du, X.-J.; Zhang, X.; Wang, X.-Y.; Su, Y.; Li, P.; Wang, S. Isolation and characterization of *Listeria monocytogenes* in Chinese food obtained from the central area of China. *Food Control* 2016, 74, 9–16. <https://doi.org/10.1016/j.foodcont.2016.11.024>.
- Liu, D.; Lawrence, M.L.; Austin, F.W.; Ainsworth, A.J. A multiplex PCR for species- and virulence-specific determination of *Listeria monocytogenes*. *J. Microbiol. Methods* 2007, 71, 133–140. <https://doi.org/10.1016/j.mimet.2007.08.007>.
- Lomonaco, S.; Patti, R.; Knabel, S.J.; Civera, T. Detection of virulence-associated genes and epidemic clone markers in *Listeria monocytogenes* isolates from PDO Gorgonzola cheese. *Int. J. Food Microbiol.* 2012, 160, 76–79. <https://doi.org/10.1016/j.ijfoodmicro.2012.09.011>.
- Kaur, S.; Malik, S.; Vaidya, V.; Barbuddhe, S. *Listeria monocytogenes* in spontaneous abortions in humans and its detection by multiplex PCR. *J. Appl. Microbiol.* 2007, 103, 1889–1896. <https://doi.org/10.1111/j.1365-2672.2007.03414.x>.
- Egervärn, M.; Roos, S.; Lindmark, H. Identification and characterization of antibiotic resistance genes in *Lactobacillus reuteri*-and *Lactobacillus plantarum*. *J. Appl. Microbiol.* 2009, 107, 1658–1668. <https://doi.org/10.1111/j.1365-2672.2009.04352.x>.
- Sutcliffe, J.; Grebe, T.; Tait-Kamradt, A.; Wondrack, L. Detection of erythromycin-resistant determinants by PCR. *Antimicrob. Agents Chemother.* 1996, 40, 2562–2566. <https://doi.org/10.1128/aac.40.11.2562>.
- Delmani, F.; Jaran, A.S.; Tarazi, Y.A.; Masaadeh, H.; Zaki, O.; Irbid, T. Characterization of ampicillin resistant gene (blaTEM-1) isolated from *E. coli* in Northern Jordan. *Asian J. Biomed. Pharm. Sci.* 2017, 7, 11–15.
- Grape, M.; Motakefi, A.; Pavuluri, S.; Kahlmeter, G. Standard and real-time multiplex PCR methods for detection of trimethoprim resistance *dhfr* genes in large collections of bacteria. *Clin. Microbiol. Infect.* 2007, 13, 1112–1118. <https://doi.org/10.1111/j.1469-0691.2007.01807.x>.

13. Bacci, C.; Boni, E.; Alpigiani, I.; Lanzoni, E.; Bonardi, S.; Brindani, F. Phenotypic and genotypic features of antibiotic resistance in *Salmonella enterica* isolated from chicken meat and chicken and quail carcasses. *Int. J. Food Microbiol.* 2012, 160, 16–23. <https://doi.org/10.1016/j.ijfoodmicro.2012.09.014>.
14. Poppe, C.; Martin, L.C.; Gyles, C.L.; Reid-Smith, R.; Boerlin, P.; McEwen, S.A.; Prescott, J.F.; Forward, K.R. Acquisition of Resistance to Extended-Spectrum Cephalosporins by *Salmonella enterica* subsp. *enterica* Serovar Newport and *Escherichia coli* in the Turkey Poult Intestinal Tract. *Appl. Environ. Microbiol.* 2005, 71, 1184–1192. <https://doi.org/10.1128/aem.71.3.1184-1192.2005>.
15. Warke, S.R.; Ingle, V.C.; Kurkure, N.V.; Tembhurne, P.A.; Prasad, M.; Chaudhari, S.P.; Barbuddhe, S.B. Biofilm Formation and Associated Genes in *Listeria Monocytogenes*. *Indian J. Veter-Sci. Biotechnol.* 2017, 12, 7–12. <https://doi.org/10.21887/ijvst.v12i3.7079>.
